# Supplementary material for: Detection and climatology of Saharan dust frequency and mass at the Jungfraujoch (3580 m asl, Switzerland)
Source: Copernicus journal article supplement (doi:10.5194/egusphere-2025-4162), 2025-09-03
Supplement: Supplementary file 1 [file egusphere-2025-4162-supplement.pdf]

# Supplement to "Detection and climatology of Saharan dust frequency and mass at the Jungfrauoch (3580 m asl, Switzerland)"

Martine Collaud Coen<sup>1</sup>, Benjamin Tobias Brem<sup>2</sup>, Martin Gysel-Beer<sup>2</sup>, Robin Modini<sup>2</sup>, Stephan Henne<sup>3</sup>, Martin Steinbacher<sup>3</sup>, Davide Putero<sup>4</sup>, and Kostantinos Eleftheriadis<sup>5</sup>

<sup>1</sup>Federal Office of Meteorology and Climatology, MeteoSwiss, CH-1530 Payerne, Switzerland

<sup>2</sup>PSI Center for Energy and Environmental Sciences, 5232 Villigen PSI, Switzerland

<sup>3</sup>Swiss Federal Laboratories for Materials Science and Technology, Empa, CH-8600 Dübendorf, Switzerland

<sup>4</sup>National Research Council of Italy – Institute of Atmospheric Sciences and Climate, CNR–ISAC, Turin, Italy

<sup>5</sup>Environmental Radioactivity & Aerosol Tech. for Atmospheric & Climate Impacts, INRaSTES, National Centre of Scientific Research “Demokritos”, Athens, Greece

**Correspondence:** Martine Collaud Coen, [martine.collaudcoen@meteoswiss.ch](mailto:martine.collaudcoen@meteoswiss.ch))

## 1 Instruments life cycle at JFJ

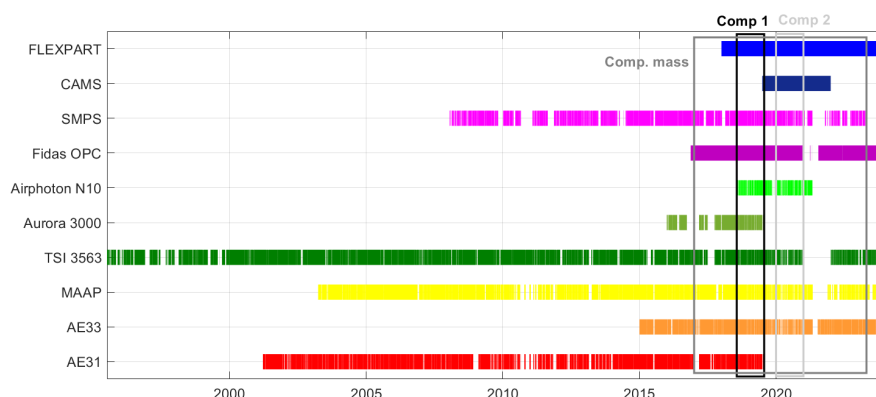

**Figure S1.** Availability of the instruments at the JFJ and of the CAMS dust product and FLEXPART source sensitivities. Comp. 1 corresponds to the period with the comparison between all in-situ detection methods, comp. 2 to the period with the comparison between the in-situ methods, CAMS dust product and FLEXPART source sensitivities and comp. mass to the period allowing the mass estimation from the size distributions from the SMPS and FIDAS.

5 2 Effect of the application of a threshold on the scattering and absorption coefficients on the SDE detection

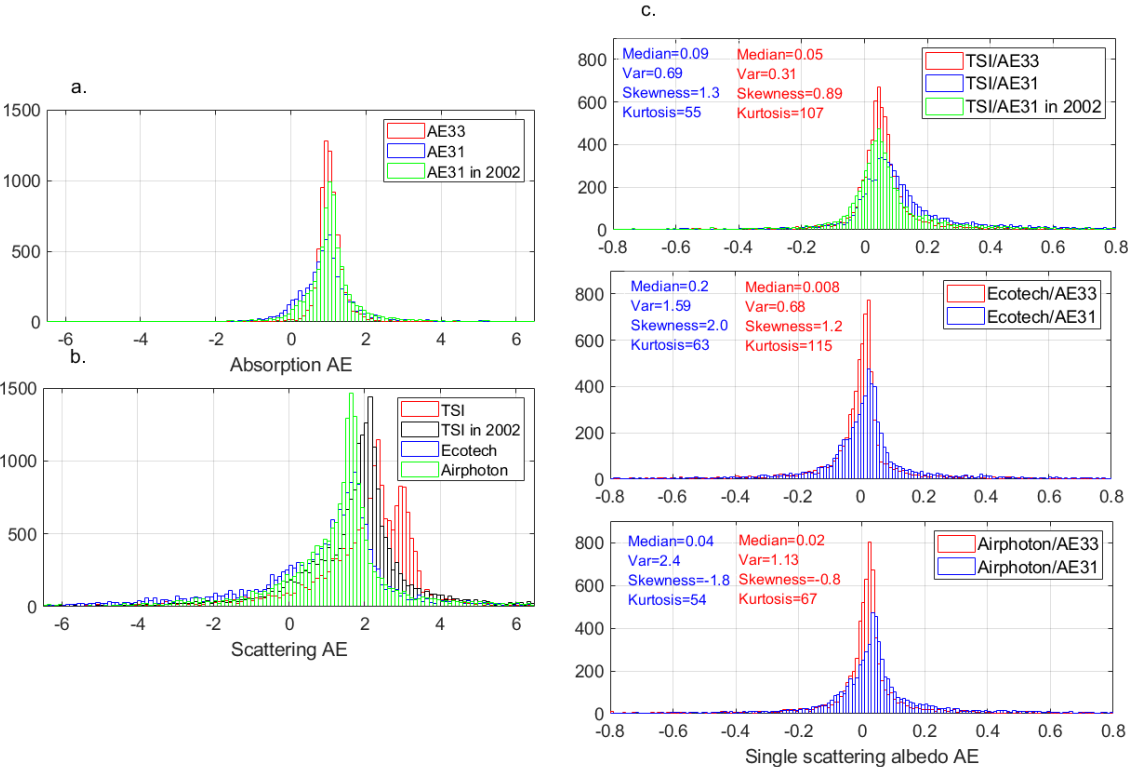

**Figure S2.** Histogram of the Ångström exponents for the simultaneous measurement period (August 2018 to July 2019) without threshold applied to the scattering and absorption coefficients for a) AAE for the AE31 and AE33, as well as AAE histogram for the first year of AE31 observation in 2002, b) SAE for the TSI, Ecotech and Airphoton nephelometers and c) SSAAE for all pairs of instruments

**Table S1.** Number of hours with SDE detected by the various pairs of instruments from 1<sup>st</sup> of August 2018 to the 31<sup>st</sup> of July 2019 without thresholds for the scattering and absorption coefficients.

| Nb hours with SDE | ≥ 4h | ≥ 6h | ≥ 12h | ≥ 24h | ≥ 48h |
|-------------------|------|------|-------|-------|-------|
| TSI-AE31          | 218  | 126  | 67    | 0     | 0     |
| TSI-AE33          | 274  | 183  | 67    | 0     | 0     |
| Ecotech-AE31      | 1232 | 888  | 447   | 115   | 52    |
| Ecotech-AE33      | 1795 | 1378 | 807   | 309   | 111   |
| Airphoton-AE31    | 940  | 573  | 277   | 144   | 86    |
| Airphoton-AE33    | 1433 | 1035 | 501   | 184   | 85    |

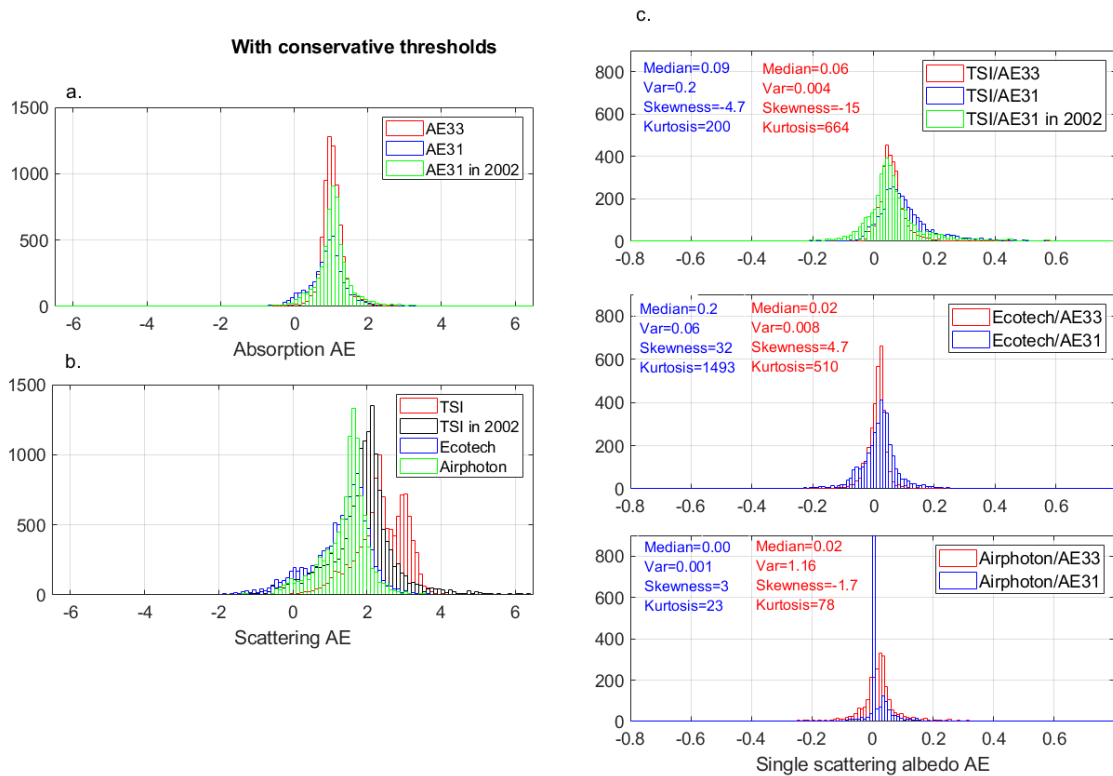

**Figure S3.** Histogram of the Ångström exponents for the simultaneous measurement period (August 2018 to July 2019) with conservative thresholds applied to the scattering ( $1\text{e-}6\text{ m}^{-1}$ ) and absorption ( $1\text{e-}7\text{ m}^{-1}$ ) coefficients are restricted for a) AAE for the AE31 and AE33, as well as AAE histogram for the first year of AE31 observation in 2002, b) SAE for the TSI, Ecotech and Airphoton nephelometers and c) SSAAE for all pairs of instruments

**Table S2.** Number of hours with SDE detected by the various pairs of instruments from 1<sup>st</sup> of August 2018 to the 31<sup>st</sup> of July 2019 for scattering coefficient larger than  $1\text{ Mm}^{-1}$  and absorption coefficient larger than  $0.1\text{ Mm}^{-1}$  (conservative threshold)

| Nb hours with SDE | $\geq 4\text{h}$ | $\geq 6\text{h}$ | $\geq 12\text{h}$ | $\geq 24\text{h}$ | $\geq 48\text{h}$ |
|-------------------|------------------|------------------|-------------------|-------------------|-------------------|
| TSI-AE31          | 105              | 91               | 67                | 0                 | 0                 |
| TSI-AE33          | 106              | 100              | 67                | 0                 | 0                 |
| Ecotech-AE31      | 596              | 888              | 447               | 115               | 52                |
| Ecotech-AE33      | 613              | 1378             | 807               | 309               | 111               |
| Airphoton-AE31    | 91               | 195              | 158               | 85                | 85                |
| Airphoton-AE33    | 497              | 867              | 370               | 72                | 0                 |

3 Number of hours with SDE detected by various pairs of instrument from August 2018 to July 2019

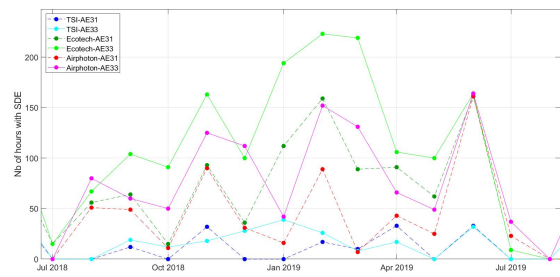

**Figure S4.** Number of hours with SDE detected by the various pairs of instruments for the simultaneous measuring period from 1<sup>st</sup> of August 2018 to the 31<sup>st</sup> of July 2019 for SDE duration of at least 6h without threshold.

4 Comparison of all SDE detection methods

**Table S3.** Number of dust hours detected by the various methods in 2020 without threshold for the scattering and absorption coefficients.

| Nb hours with SDE in 2020 | ≥ 4h | ≥ 6h | ≥ 12h | ≥ 24h | ≥ 48h |
|---------------------------|------|------|-------|-------|-------|
| TSI-AE33                  | 914  | 700  | 478   | 325   | 178   |
| TSI-AE33 cor              | 900  | 691  | 463   | 325   | 178   |
| Airphoton-AE33            | 1451 | 1072 | 590   | 375   | 231   |
| FIDAS                     | 1074 | 1003 | 813   | 524   | 153   |
| FIDAS+FLEXPART            | 685  | 671  | 522   | 380   | 81    |
| CAMS                      | 1224 | 1198 | 1107  | 860   | 547   |
| FLEXPART                  | 1807 | 1759 | 1557  | 1255  | 956   |

**Table S4.** Number of dust hours detected by the various methods in 2020 for scattering coefficient larger than 1 Mm<sup>-1</sup> and absorption coefficient larger than 0.1 Mm<sup>-1</sup> (conservative thresholds).

| Nb hours with SDE in 2020 | ≥ 4h | ≥ 6h | ≥ 12h | ≥ 24h | ≥ 48h |
|---------------------------|------|------|-------|-------|-------|
| TSI-AE33                  | 625  | 556  | 421   | 306   | 172   |
| Airphoton-AE33            | 969  | 1072 | 590   | 375   | 231   |
| FIDAS                     | 1074 | 1003 | 813   | 524   | 153   |
| FIDAS+FLEXPART            | 685  | 671  | 522   | 380   | 81    |
| CAMS                      | 1224 | 1198 | 1107  | 860   | 547   |
| FLEXPART                  | 1807 | 1759 | 1557  | 1255  | 956   |

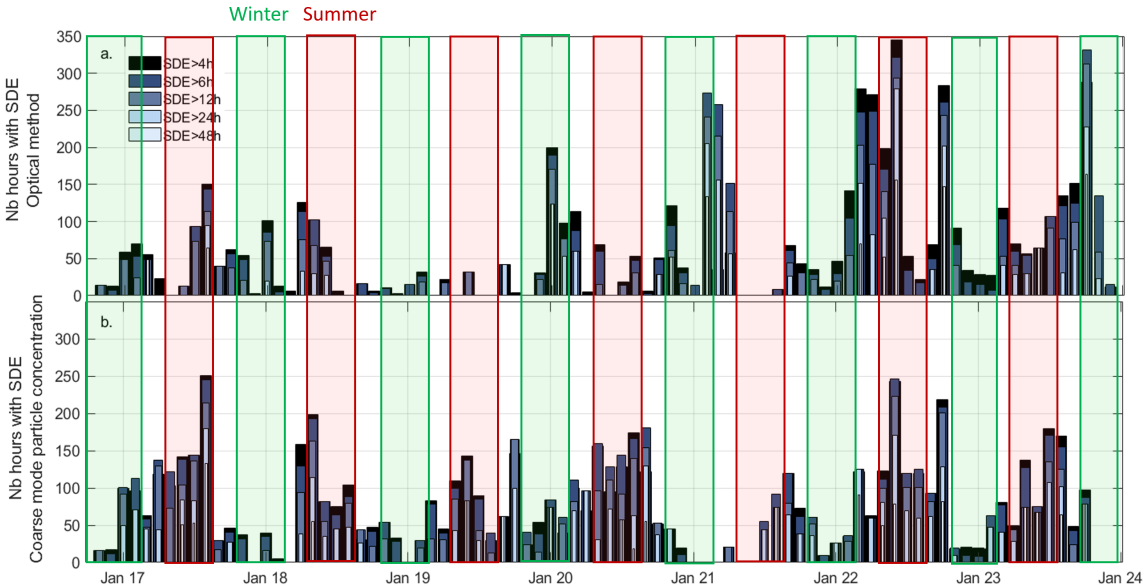

**Figure S5.** Monthly number of SD hours detected by a) the optical method with the noise threshold and b) the coarse mode particle concentration for 2017-2021.

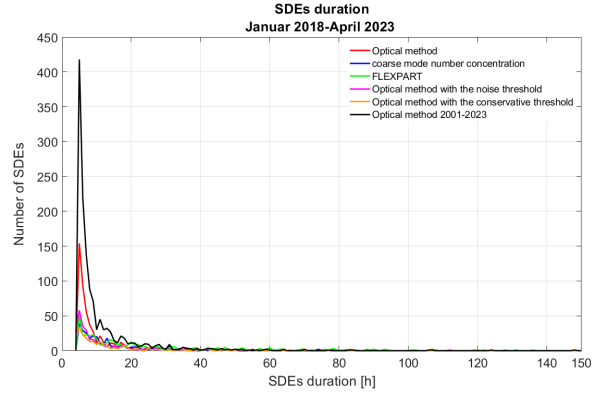

**Figure S6.** Histogram of the SDEs duration for the optical method applied to TSI-AE33 without threshold and with the noise and conservative thresholds, the coarse mode particle concentration, and the FLEXPART source sensitivities for the period from Januar 2018 to April 2023.

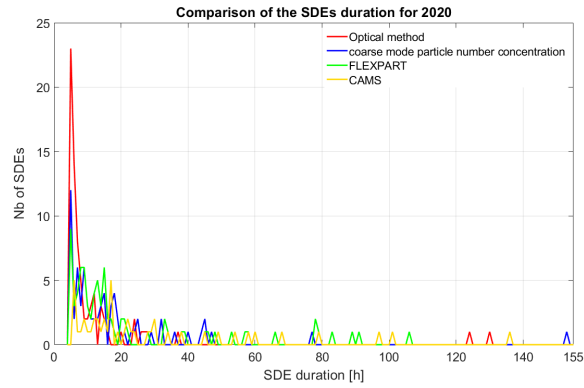

**Figure S7.** Histogram of the SDEs duration for the optical method applied to TSI-AE33 without threshold, the coarse mode particle concentration, the FLEXPART source sensitivities, and CAMS dust product for 2020.

## 6 Size distribution of number, surface and volume concentration

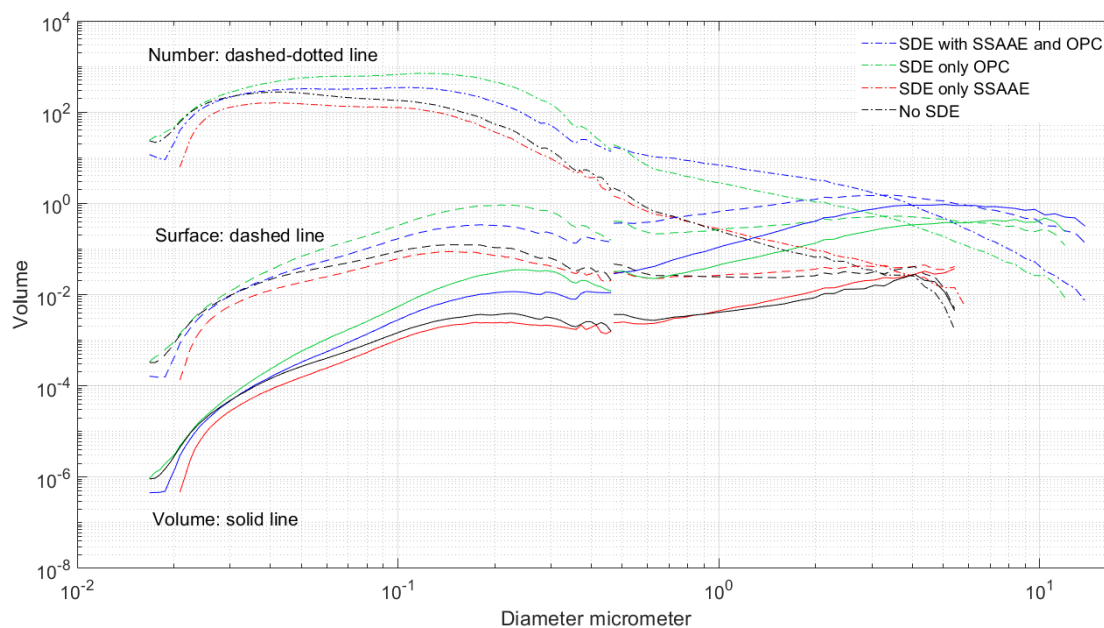

**Figure S8.** Number, surface and volume concentrations as a function of the particle diameter SDE detected by both in-situ methods without threshold in blue, by only the coarse mode particle concentration in green, by only the optical method in red and non-dust aerosol in black

## 7 SDE climatology

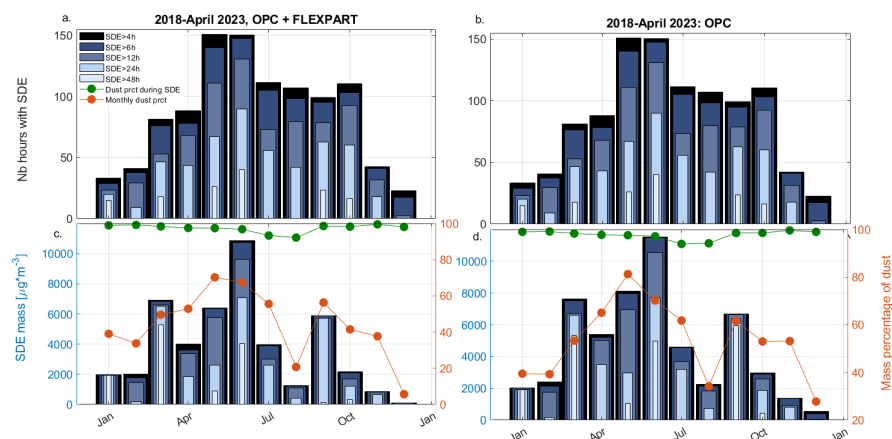

**Figure S9.** 1.2018-4.2023 monthly climatology of SDE hours and mass detected by a) the coarse mode particle number concentration and the FLEXPART source sensitivity corresponding to the real method described by Duchi et al., 2016 and b) only the coarse mode particle concentration.

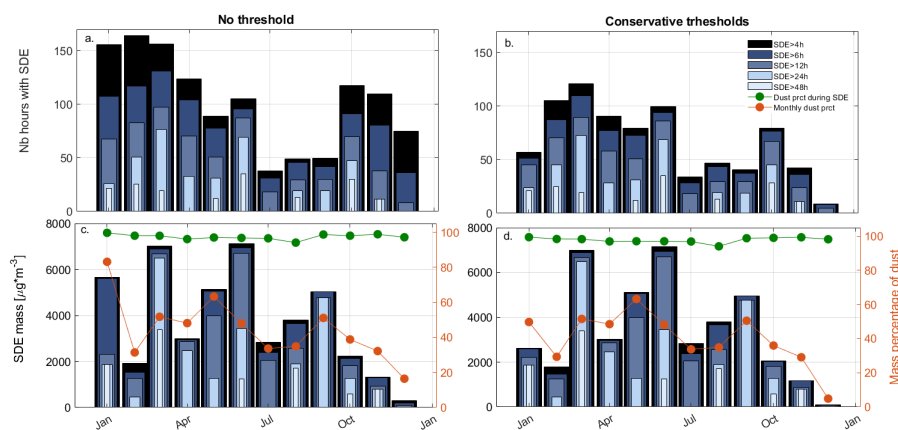

**Figure S10.** 1.2017-4.2023 monthly climatology of SDE hours and mass detected by the optical method a) and c) with no threshold and b) and d) with the conservative thresholds of  $1 \cdot 10^{-6}$  and  $1 \cdot 10^{-7} \text{ m}^{-1}$  applied to the scattering and absorption coefficients.



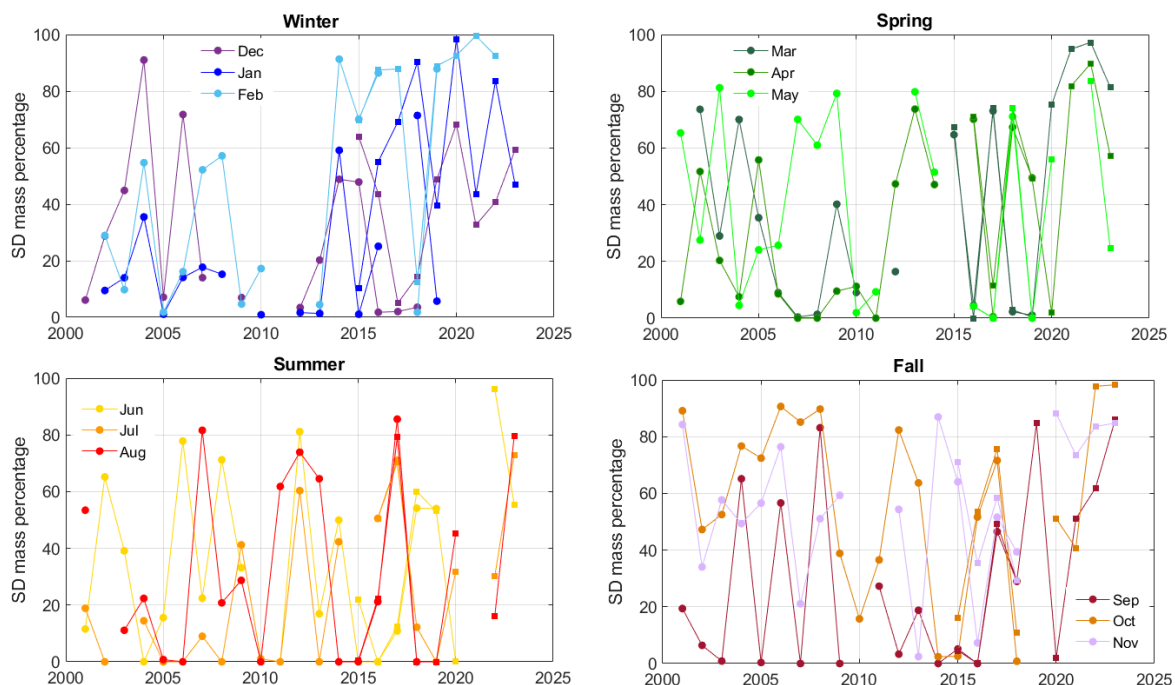

**Figure S11.** Monthly climatology of the mass percentage of SD for the TSI-AE31 (circles) pair until July 2019 and the TSI-AE33 (squares) pair since January 2015 during a) winter, b) spring, c) summer and d) fall. Months with less than 50% of measurement are not reported and the noise threshold was applied to all instruments.

## 8 SDE source sensitivity

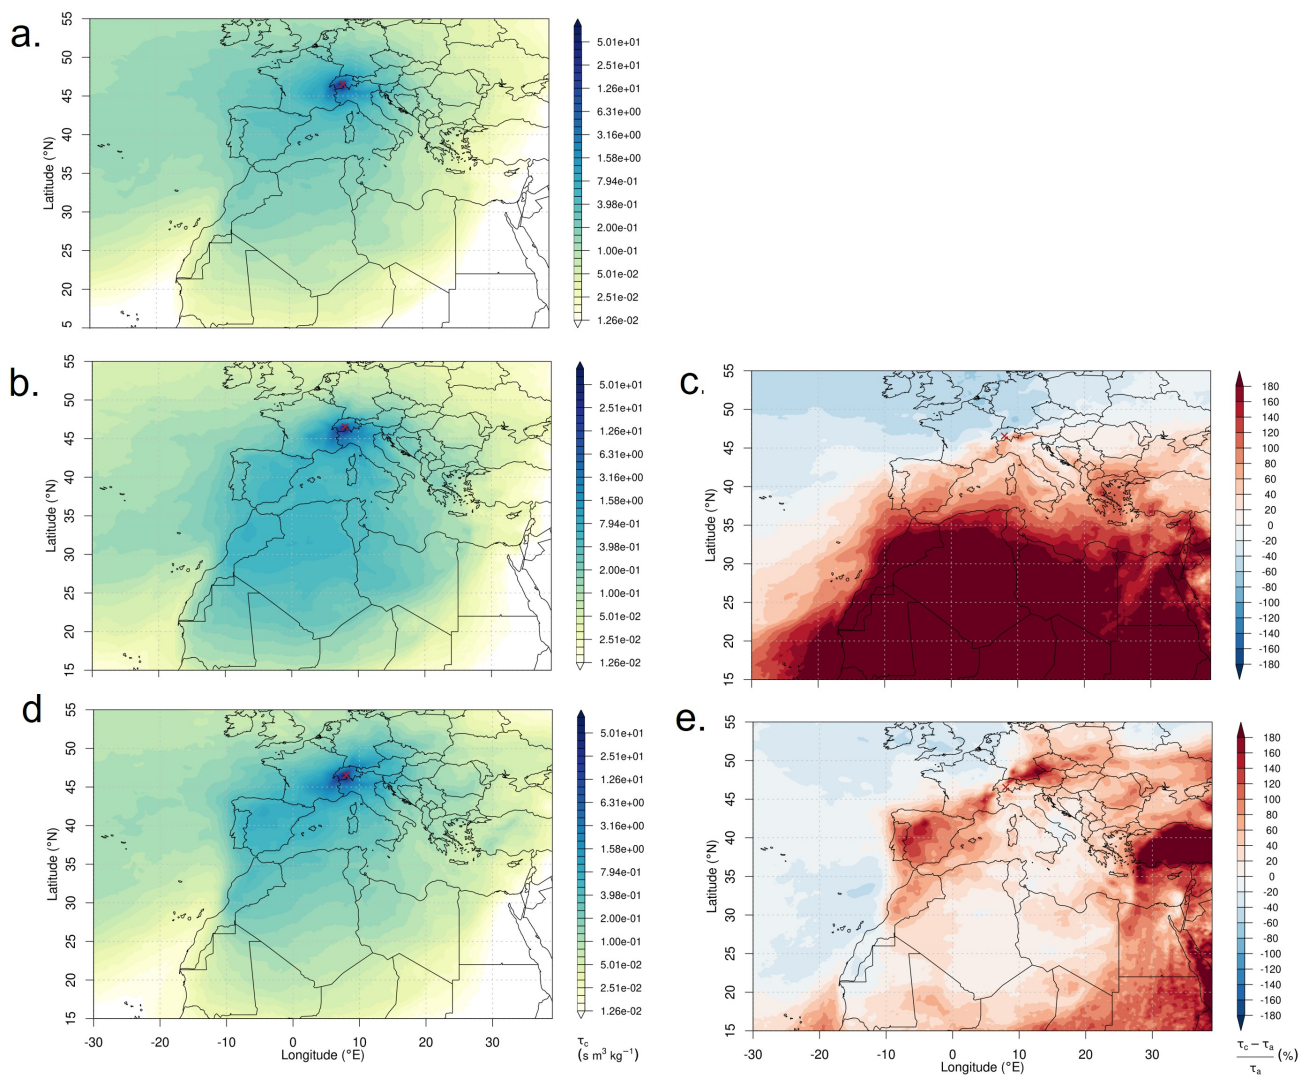

**Figure S12.** Average (a, b and d) and relative (c and e) source sensitivity based on 2018-2023 FLEXPART simulations a) for the whole period, b) and c) during SDE detected by the optical method and the coarse mode particle concentration and d) and e) during SDE detected by the coarse mode particle concentration but not by the optical method. Relative source sensitivities are derived by dividing specific SDE average source sensitivities (b, d) by the period-average source sensitivity (a). The minimum SD duration is 4 h for all the plots.
